# Supplementary material for: The Impact of Education Level on Weight Loss in a Primary Care-Anchored eHealth Lifestyle Coaching Program in Denmark: A Randomized Controlled Trial
Source: MDPI journal article supplement (doi:10.3390/nu16060795), 2024-03-11
Supplement: s1 [file s1]

**Table S1. Patient questionnaire on sociodemographic data and lifestyle habits at baseline and at 6,12 and 24 months.**

| <b>1. Select below your highest completed level of education</b>                            |  |
|---------------------------------------------------------------------------------------------|--|
| None = No higher education                                                                  |  |
| Short = Short higher education of 2 years (ex. business academy)                            |  |
| Medium = Medium-term higher education of 3-4.5 years (ex. professional bachelor)            |  |
| Long = Long higher education of at least 5 years (ex. graduate and Ph.D. at the university) |  |

| <b>2. Select your marital status</b>           |  |
|------------------------------------------------|--|
| Married or registered partnership              |  |
| Single                                         |  |
| Widow or longest living partner                |  |
| Divorce or no longer in registered partnership |  |

| <b>3. Select your employment status</b>                  |  |
|----------------------------------------------------------|--|
| On the labor market (employed or self-employed)          |  |
| Unemployed (maternity leave or on unemployment benefits) |  |
| Unemployed (cash benefits)                               |  |
| Student                                                  |  |
| Early retirement pension                                 |  |
| Retired                                                  |  |

| <b>4. How often do you eat vegetables and / or root vegetables (fresh as well as frozen)?</b> |  |
|-----------------------------------------------------------------------------------------------|--|
| Twice daily or more often                                                                     |  |
| Once a day                                                                                    |  |
| Sometimes during the week                                                                     |  |
| Once a week or less frequently                                                                |  |

| <b>5. How often do you eat fruit and / or berries (fresh, frozen, preserves, or juice / smoothie)?</b> |  |
|--------------------------------------------------------------------------------------------------------|--|
| Twice daily or more often                                                                              |  |
| Once a day                                                                                             |  |
| Sometimes during the week                                                                              |  |
| Once a week or less frequently                                                                         |  |

| <b>6. How often do you eat seafood as a main course?</b> |  |
|----------------------------------------------------------|--|
| Three times a week or more often                         |  |
| Twice a week                                             |  |
| Once a week                                              |  |
| A few times a month or less                              |  |

|                                                                               |  |
|-------------------------------------------------------------------------------|--|
| <b>7. How often do you eat pastry, chocolate, sweets and / or drink soda?</b> |  |
| Daily                                                                         |  |
| Almost every day                                                              |  |
| A couple of times a week                                                      |  |
| Once a week or less frequently                                                |  |

|                                                                                                                                                                            |  |
|----------------------------------------------------------------------------------------------------------------------------------------------------------------------------|--|
| <b>8. How much time do you spend per week on physical exercise that makes you breathless?<br/>(For example, running, football, aerobics, tennis, jogging, or the like)</b> |  |
| 0 minutes / no time                                                                                                                                                        |  |
| Less than 30 minutes                                                                                                                                                       |  |
| 30-60 minutes (½-1 hour)                                                                                                                                                   |  |
| 60-120 minutes (1-2 hours)                                                                                                                                                 |  |
| More than 120 minutes (2 hours or more)                                                                                                                                    |  |

|                                                                                                                                                                      |  |
|----------------------------------------------------------------------------------------------------------------------------------------------------------------------|--|
| <b>9. How much time do you spend per week on everyday physical activity? (For example, a walk, light gardening, cleaning, cycling, to and from work or the like)</b> |  |
| 0 minutes / No time                                                                                                                                                  |  |
| Less than 30 minutes                                                                                                                                                 |  |
| 30-60 minutes (½ - 1 hour)                                                                                                                                           |  |
| 60-90 minutes (1 - 1½ hour)                                                                                                                                          |  |
| 90-150 minutes (1½ - 2½ hours)                                                                                                                                       |  |
| 150-300 minutes (2½ - 5 hours)                                                                                                                                       |  |
| More than 300 minutes (5 hours or more)                                                                                                                              |  |

**Table S2.** Associations between weight loss and baseline characteristics and changes in physical and dietary behaviors between baseline and six months using multiple regression analyses.

|                                                             | All participants |         | Multivariate regression<br>Intervention |         | Control          |         |
|-------------------------------------------------------------|------------------|---------|-----------------------------------------|---------|------------------|---------|
|                                                             | Beta coefficient | P-value | Beta coefficient                        | P-value | Beta coefficient | P-value |
| <b>Age (years)</b>                                          | 0.06             | 0.029   |                                         |         |                  |         |
|                                                             | [0.0065 to 0.12] |         |                                         |         |                  |         |
| <b>Education level</b>                                      |                  |         |                                         |         |                  |         |
| None vs. medium                                             |                  |         | -1.82                                   | 0.15    |                  |         |
|                                                             |                  |         | [-4.32 - 0.67]                          |         |                  |         |
| Short vs. medium                                            |                  |         | 1.81                                    | 0.076   |                  |         |
|                                                             |                  |         | [-0.19 - 3.81]                          |         |                  |         |
| Long vs. medium                                             |                  |         | 0.46                                    | 0.74    |                  |         |
|                                                             |                  |         | [-2.32 - 3.24]                          |         |                  |         |
| <b>Everyday physical activity</b>                           |                  |         |                                         |         |                  |         |
| Stable vs. worsen                                           | 1.57             | 0.05    | 1.92                                    | 0.092   |                  |         |
|                                                             | [-0.0018 - 3.15] |         | [-0.32 - 4.16]                          |         |                  |         |
| Improved vs. worsen                                         | 1.68             | 0.022   | 2.60                                    | 0.014   |                  |         |
|                                                             | [0.24 - 3.11]    |         | [0.54 - 4.66]                           |         |                  |         |
| <b>Dietary habits – Vegetables and / or root vegetables</b> |                  |         |                                         |         |                  |         |
| Stable vs. worsen                                           | 0.75             | 0.45    | 1.21                                    | 0.42    |                  |         |
|                                                             | [-1.20 - 2.70]   |         | [-1.75 - 4.18]                          |         |                  |         |
| Improved vs. worsen                                         | 2.46             | 0.018   | 3.84                                    | 0.013   |                  |         |
|                                                             | [0.43 - 4.49]    |         | [0.83 - 6.84]                           |         |                  |         |
| <b>Dietary habits - Pastry, chocolate, sweets, soda</b>     |                  |         |                                         |         |                  |         |
| Stable vs. worsen                                           | 0.98             | 0.34    | 2.24                                    | 0.093   |                  |         |
|                                                             | [-1.02 - 2.97]   |         | [-0.38 - 4.88]                          |         |                  |         |
| Improved vs. worsen                                         | 1.92             | 0.057   | 2.39                                    | 0.078   |                  |         |
|                                                             | [-0.057 - 3.90]  |         | [-0.27 - 5.06]                          |         |                  |         |

|                             |               |        |                 |       |
|-----------------------------|---------------|--------|-----------------|-------|
| Randomization, intervention | 2.94          | <0.001 |                 |       |
|                             | [1.66 - 4.21] |        |                 |       |
| Obesity vs. Diabetes        |               |        | -1.92           | 0.009 |
|                             |               |        | [-3.35 - -0.48] |       |
| Adjusted R-square           | 0.19          | 0.16   |                 | 0.068 |

**Table S3.** Associations between weight loss and baseline characteristics and changes in physical and dietary behaviors between baseline and twelve months using multiple regression analyses.

|                                                         | 12 months<br>Multivariat regression |         |                        |         |                        |         |
|---------------------------------------------------------|-------------------------------------|---------|------------------------|---------|------------------------|---------|
|                                                         | All participants                    |         | Intervention           |         | Control                |         |
|                                                         | Beta koefficient                    | P-value | Beta koefficient       | P-value | Beta koefficient       | P-value |
| <b>Age (years)</b>                                      | 0.08<br>[-0.001 - 0.16]             | 0.05    |                        |         |                        |         |
| <b>Everyday activity</b>                                |                                     |         |                        |         |                        |         |
| Stable vs. worsen                                       | 2.66<br>[0.35 - 4.97]               | 0.02    | 3.72<br>[0.48 - 6.97]  | 0.03    |                        |         |
| Improved vs. worsen                                     | 2.49<br>[0.47 - 4.50]               | 0.02    | 2.67<br>[-0.10 - 5.44] | 0.059   |                        |         |
| <b>Dietary habits - Pastry, chocolate, sweets, soda</b> |                                     |         |                        |         |                        |         |
| Stable vs. worsen                                       | 2.44<br>[-0.65 - 5.54]              | 0.12    |                        |         | 2.27<br>[-1.55 - 6.08] | 0.24    |
| Improved vs. worsen                                     | 4.82<br>[1.67 - 7.97]               | 0.003   |                        |         | 5.70<br>[1.69 - 9.72]  | 0.006   |
| <b>Randomization, intervention</b>                      | 2.75<br>[0.97 - 4.54]               | 0.003   |                        |         |                        |         |
| <b>Adjusted R-square</b>                                | 0.13                                |         | 0.03                   |         | 0.12                   |         |

**Table S4.** Associations between weight loss and baseline characteristics and changes in physical and dietary behaviors between baseline and twelve months.

|                                                                                | 12 months                    |         |                              |         |                              |         |
|--------------------------------------------------------------------------------|------------------------------|---------|------------------------------|---------|------------------------------|---------|
|                                                                                | Univariate regression        |         |                              |         |                              |         |
|                                                                                | All participants             |         | Intervention                 |         | Control                      |         |
|                                                                                | Beta coefficient<br>[95% CI] | P-value | Beta coefficient<br>[95% CI] | P-value | Beta coefficient<br>[95% CI] | P-value |
| <b>Age (years)</b>                                                             | 0.07<br>[-0.01 - 0.15]       | 0.10    | 0.09<br>[-0.03 - 0.21]       | 0.13    | 0.04<br>[-0.060 - 0.15]      | 0.40    |
| <b>Sex (male vs. female)</b>                                                   | -0.11<br>[-1.99 - 1.76]      | 0.90    | 0.42<br>[-2.13 - 2.97]       | 0.75    | 0.01<br>[-2.53 - 2.55]       | 0.10    |
| <b>BMI (kg/m<sup>2</sup>)</b>                                                  | -0.17<br>[-0.41 - 0.07]      | 0.15    | -0.11<br>[-0.44 - 0.21]      | 0.48    | -0.12<br>[-0.45 - 0.22]      | 0.49    |
| <b>Without T2D vs. with T2D</b>                                                | -0.41<br>[-2.21 - 1.40]      | 0.66    | 0.15<br>[-2.24 - 2.53]       | 0.90    | -1.41<br>[-3.90 - 1.09]      | 0.27    |
| <b>Education level</b>                                                         |                              |         |                              |         |                              |         |
| None vs. medium                                                                | -1.05<br>[-3.61 - 1.52]      | 0.42    | -0.98<br>[-4.48 - 2.53]      | 0.58    | -0.39<br>[-3.83 - 3.06]      | 0.82    |
| Short vs. medium                                                               | 1.20<br>[-1.02 - 3.41]       | 0.29    | 2.06<br>[-0.83 - 4.94]       | 0.16    | -0.01<br>[-3.21 - 3.18]      | 0.99    |
| Long vs. medium                                                                | 0.23<br>[-3.31 - 2.86]       | 0.88    | -0.37<br>[-4.58 - 3.84]      | 0.86    | 0.64<br>[-3.50 - 4.79]       | 0.76    |
| <b>Married or registered<br/>partnership vs.<br/>single, divorced or widow</b> | 0.9<br>[-1.07 - 2.89]        | 0.36    | 1.18<br>[-1.49 - 3.84]       | 0.38    | 0.02<br>[-2.67 - 2.70]       | 0.99    |
| <b>Employed or student<br/>vs. unemployed or retired</b>                       | 1.03<br>[-1.01 - 3.07]       | 0.32    | 0.08<br>[-2.73 - 2.89]       | 0.96    | 1.69<br>[-0.99 - 4.37]       | 0.21    |
| <b>Physical exercise</b>                                                       |                              |         |                              |         |                              |         |
| Stable vs. worsen                                                              | -0.52                        | 0.73    | -0.70                        | 0.03    | -0.61                        | 0.76    |

|                                                             |                |       |                |       |                 |       |
|-------------------------------------------------------------|----------------|-------|----------------|-------|-----------------|-------|
|                                                             | [-3.51 - 2.47] |       | [-4.83 - 3.43] |       | [-4.49 - 3.28]  |       |
| Improved vs. worsen                                         | 0.30           | 0.84  | 0.26           | 0.74  | -0.63           | 0.75  |
|                                                             | [-2.61 - 3.21] |       | [-3.74 - 4.26] |       | [-4.48 - 3.23]  |       |
| <b>Everyday physical activity</b>                           |                |       |                |       |                 |       |
| Stable vs. worsen                                           | 2.19           | 0.08  | 3.72           | 0.90  | -0.15           | 0.93  |
|                                                             | [-0.24 - 4.61] |       | [0.48 - 6.97]  |       | [-3.42 - 3.13]  |       |
| Improved vs. worsen                                         | 2.37           | 0.03  | 2.67           | 0.059 | 1.34            | 0.38  |
|                                                             | [0.24 - 4.49]  |       | [-0.10 - 5.44] |       | [-1.67 - 4.34]  |       |
| <b>Dietary habits – Vegetables and / or root vegetables</b> |                |       |                |       |                 |       |
| Stable vs. worsen                                           | 0.96           | 0.54  | 0.89           | 0.71  | 0.33            | 0.86  |
|                                                             | [-2.16 - 4.08] |       | [-3.77 - 5.55] |       | [-3.44 - 4.09]  |       |
| Improved vs. worsen                                         | 2.42           | 0.14  | 2.55           | 0.28  | 0.34            | 0.87  |
|                                                             | [-0.77 - 5.61] |       | [-2.14 - 7.24] |       | [-3.71 - 4.40]  |       |
| <b>Dietary habits – Fruit and / or berries</b>              |                |       |                |       |                 |       |
| Stable vs. worsen                                           | 0.15           | 0.90  | -0.30          | 0.86  | 0.06            | 0.97  |
|                                                             | [-2.23 - 2.54] |       | [-3.60 - 3.00] |       | [-3.07 - 3.19]  |       |
| Improved vs. worsen                                         | 1.97           | 0.13  | 2.01           | 0.25  | 0.47            | 0.79  |
|                                                             | [-0.57 - 4.51] |       | [-1.45 - 5.48] |       | [-3.00 - 3.94]  |       |
| <b>Dietary habits – Seafood</b>                             |                |       |                |       |                 |       |
| Stable vs. worsen                                           | -1.04          | 0.61  | 0.31           | 0.89  | -1.91           | 0.70  |
|                                                             | [-5.03 - 2.94] |       | [-4.25 - 4.87] |       | [-11.68 - 7.86] |       |
| Improved vs. worsen                                         | 2.47           | 0.25  | 2.85           | 0.24  | 2.79            | 0.58  |
|                                                             | [-1.70 - 6.63] |       | [-1.95 - 7.66] |       | [-7.14 - 12.73] |       |
| <b>Dietary habits - Pastry, chocolate, sweets, soda</b>     |                |       |                |       |                 |       |
| Stable vs. worsen                                           | 2.44           | 0.14  | 2.15           | 0.37  | 2.27            | 0.24  |
|                                                             | [-0.77 - 5.65] |       | [-2.53 - 6.82] |       | [-1.55 - 6.08]  |       |
| Improved vs. worsen                                         | 4.85           | 0.004 | 3.51           | 0.14  | 5.70            | 0.006 |
|                                                             | [1.61 - 8.09]  |       | [-1.15 - 8.16] |       | [1.69 - 9.72]   |       |
| <b>Intervention vs. control</b>                             |                |       |                |       |                 |       |
|                                                             | 3.19           | 0.001 |                |       |                 |       |
|                                                             | [1.37 - 5.02]  |       |                |       |                 |       |

**Table S5.** Associations between weight loss and baseline characteristics and changes in physical and dietary behaviors between baseline and twenty-four months.

|                                                  | 24 months              |         |                  |         |                       |         |
|--------------------------------------------------|------------------------|---------|------------------|---------|-----------------------|---------|
|                                                  | Multivariat regression |         |                  |         |                       |         |
|                                                  | All participants       |         | Intervention     |         | Control               |         |
|                                                  | Beta koefficient       | P-value | Beta koefficient | P-value | Beta koefficient      | P-value |
| Age (years)                                      |                        |         |                  |         | 0.13<br>[0.01 - 0.25] | 0.03    |
| Dietary habits - Pastry, chocolate, sweets, soda | 4.95                   | 0.02    | 5.61             | 0.055   |                       |         |
| Stable vs. worsen                                | [0.80 - 9.10]          |         | [-0.12 - 11.35]  |         |                       |         |
|                                                  | 4.56                   | 0.04    | 6.06             | 0.059   |                       |         |
| Improved vs. worsen                              | [0.19 - 8.94]          |         | [-0.24 - 12.37]  |         |                       |         |
| Adjusted R-square                                | 0.05                   |         | 0.03             |         | 0.07                  |         |
